# Supplementary material for: Porous anatase TiO2constructed from a metal–organic framework for advanced lithium-ion battery anodes
Source: Royal Society of Chemistry journal article supplement (doi:10.1039/c4ta02029d), 2014-05-29
Supplement: c4ta02029d1.pdf [file c4ta02029d1.pdf]

Supporting Information for

**Porous anatase TiO<sub>2</sub> constructed from a metal-organic framework for advanced lithium-ion battery anode**

*Ziqi Wang, Xiang Li, Hui Xu, Yu Yang, Yuanjing Cui, Hongge Pan, Zhiyu Wang, Banglin Chen\*, Guodong Qian\**

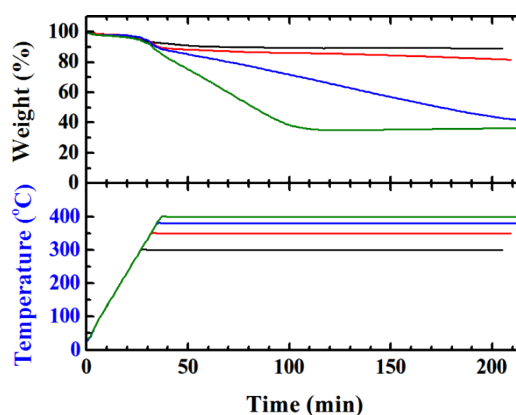

**Fig. S1.** TG curves of MIL-125(Ti) under air atmosphere at constant temperatures ranging from 300-400 °C. Weightloss and corresponding temperature are shown in lines with the same color.

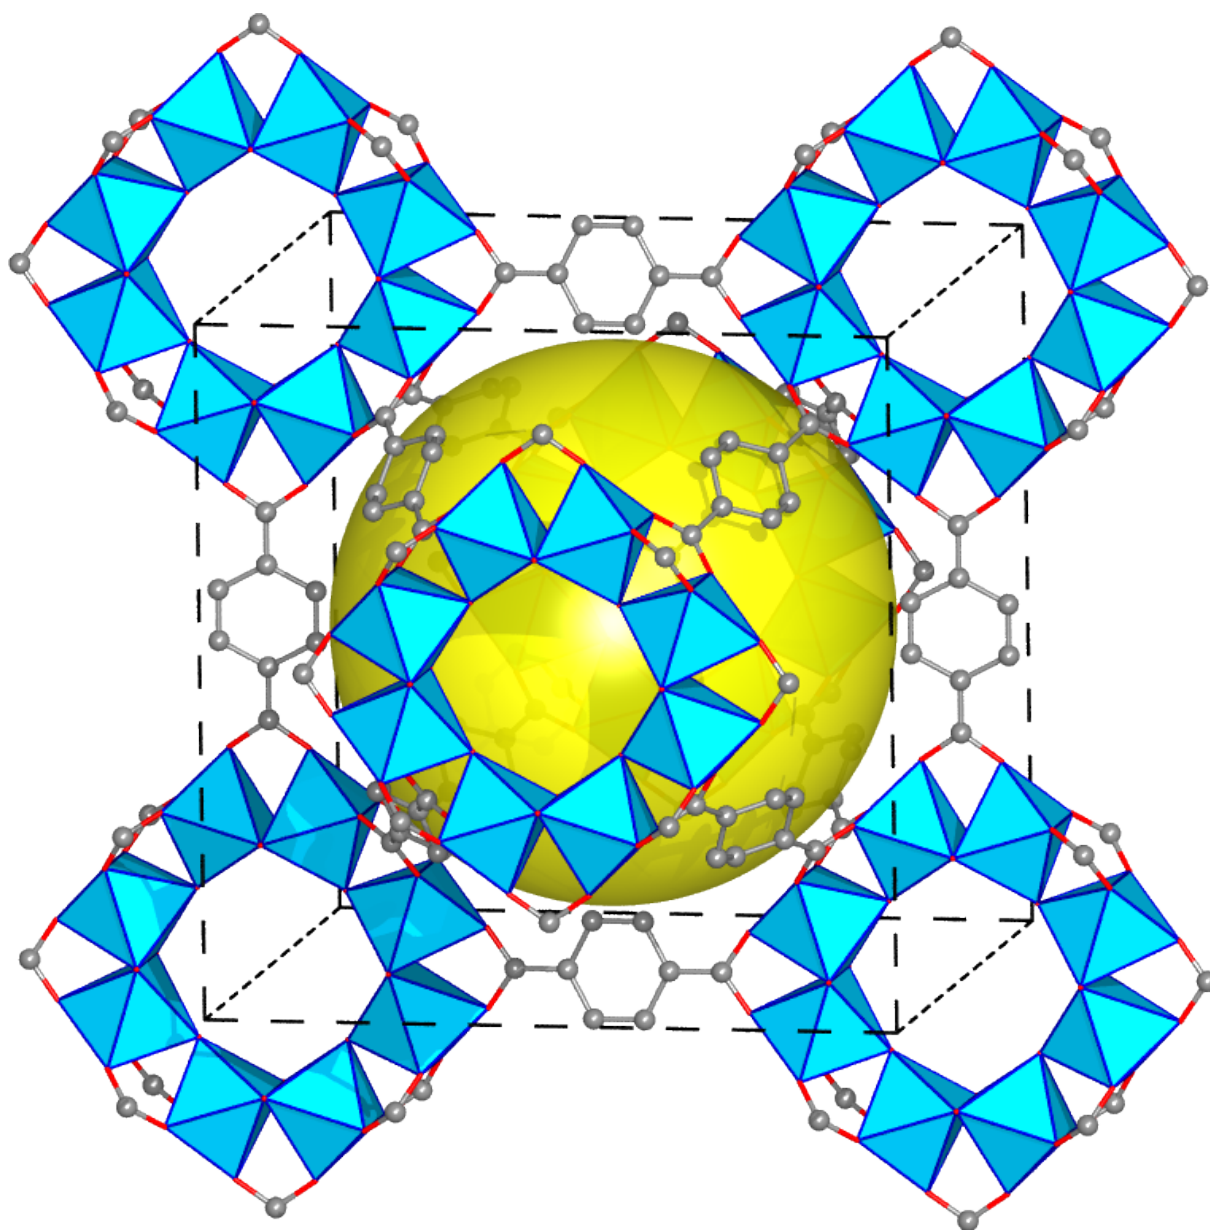

**Fig. S2.** Crystal structure of MIL-125(Ti). C, O and Ti atoms are shown in the color of grey, red and cyan separately. H atoms are omitted for clarity. Void space in the structure is filled with yellow ball.

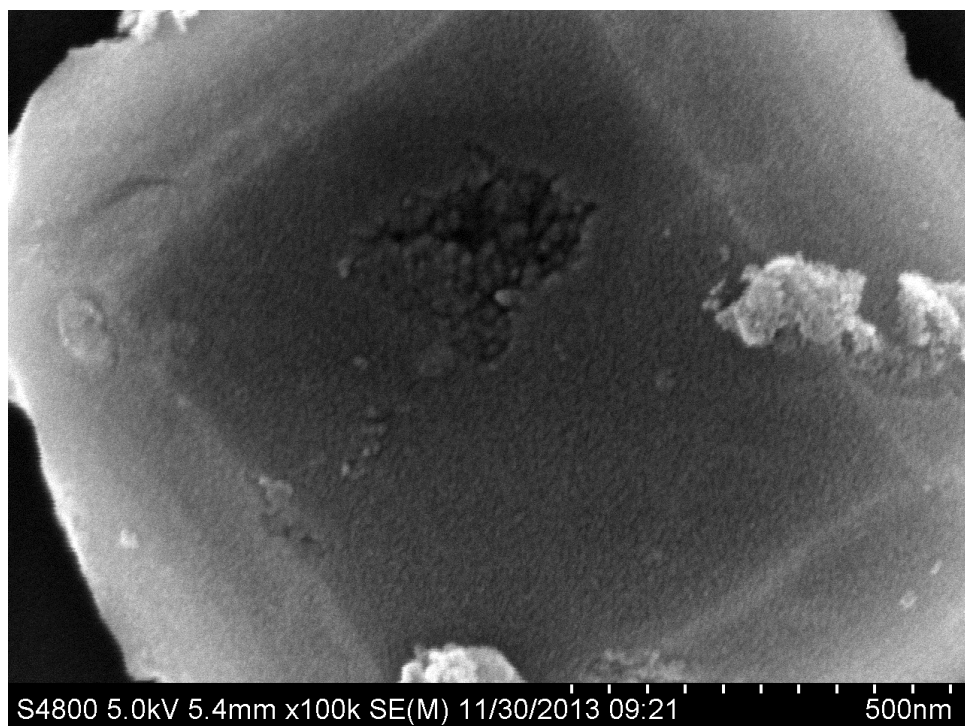

**Fig. S3.** SEM morphology of porous TiO<sub>2</sub> demonstrating nanosized tunnels on the surface.

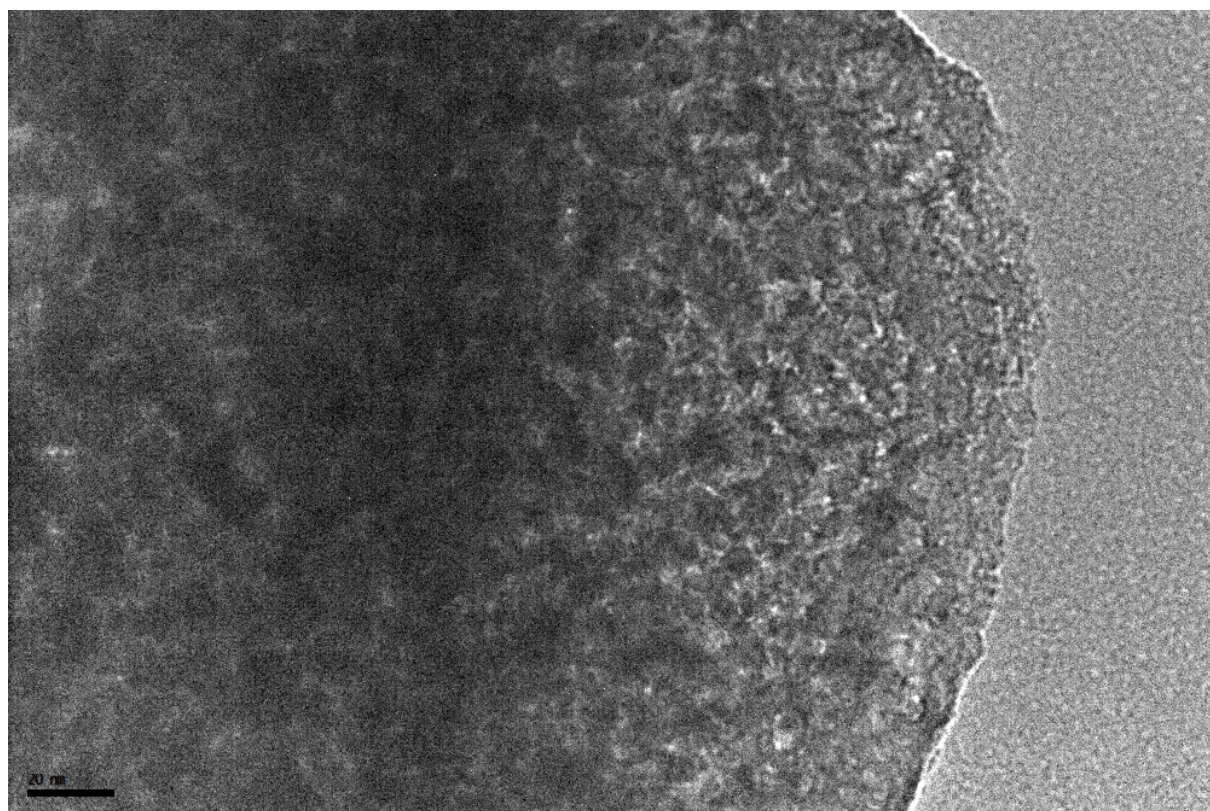

**Fig. S4.** TEM morphology of porous TiO<sub>2</sub>.

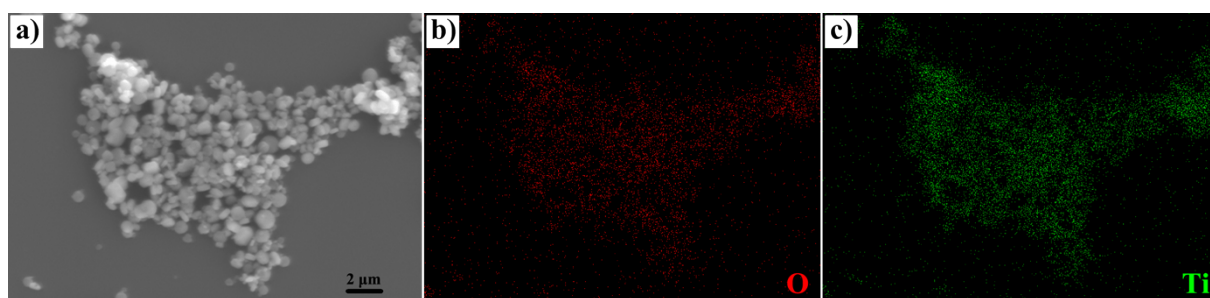

**Fig. S5.** (a) SEM morphology and corresponding (b) O, (c) Ti EDS mappings.
